# Supplementary material for: Endosomal pH-Responsive Fe-Based Hyaluronate Nanoparticles for Doxorubicin Delivery
Source: MDPI journal article supplement (doi:10.3390/molecules26123547), 2021-06-10
Supplement: s1 [file s1]

Supplementary Data

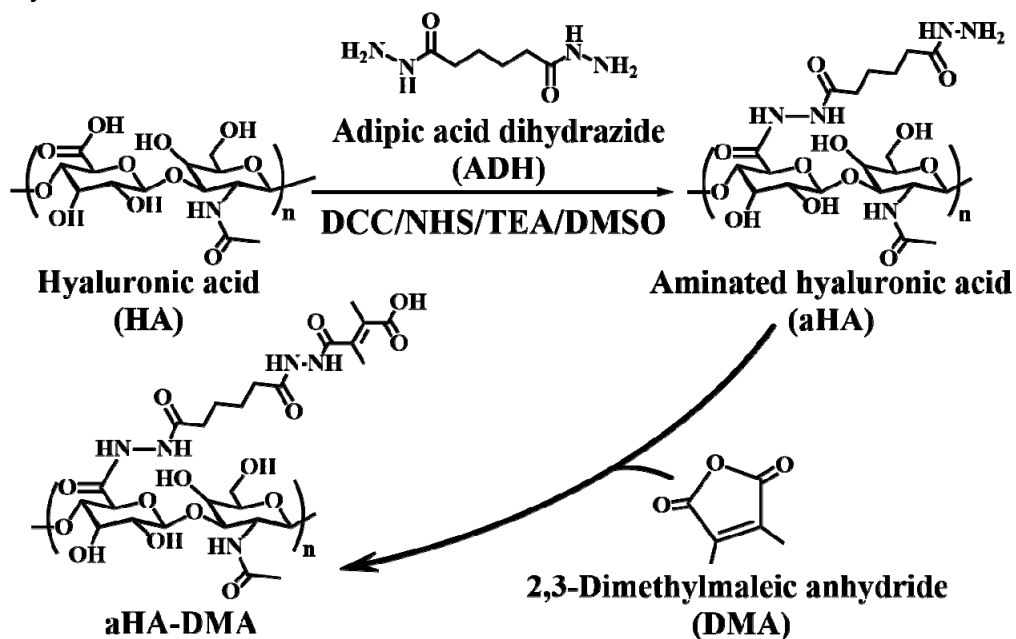

Figure S1. Synthesis procedure of aHA-DMA.

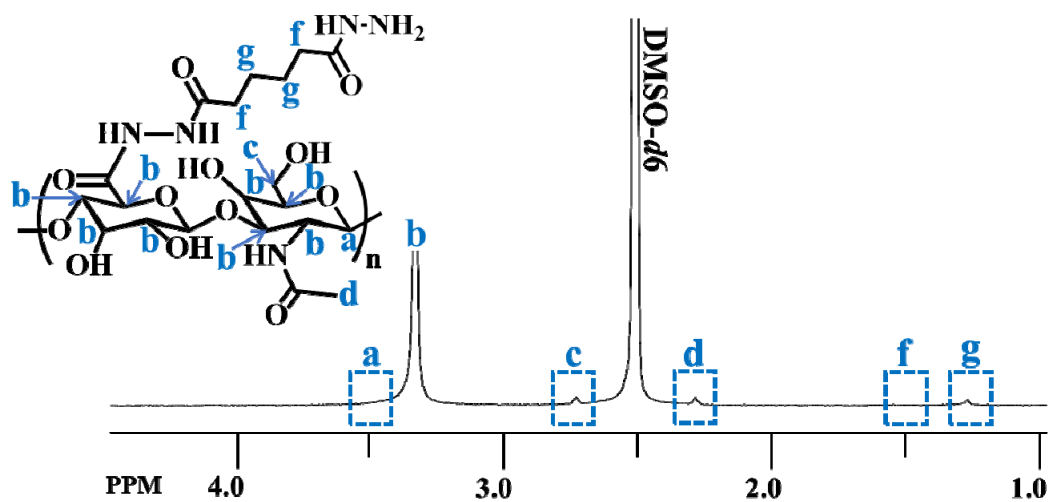Figure S2. <sup>1</sup>H-NMR peaks of aHA.

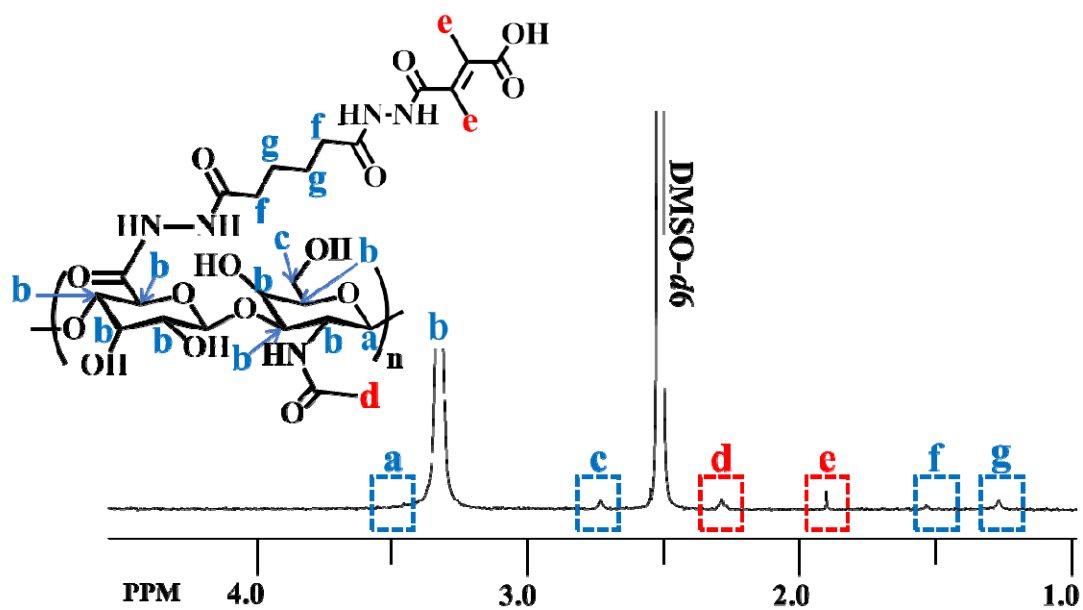

Figure S3. <sup>1</sup>H-NMR peaks of aHA-DMA<sub>0.60</sub>.

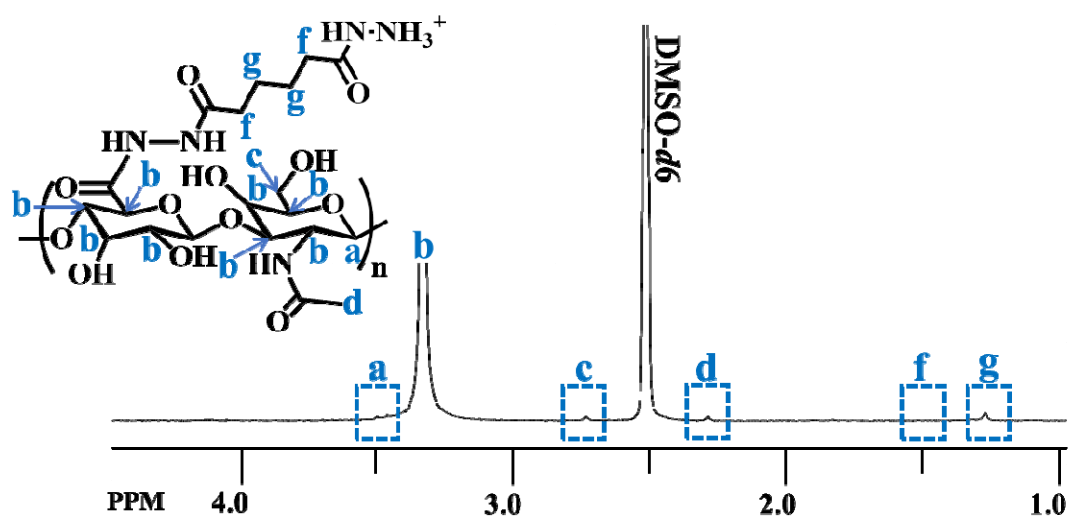

Figure S4.  $^1\text{H}$ -NMR peaks of DMA-detached aHA.

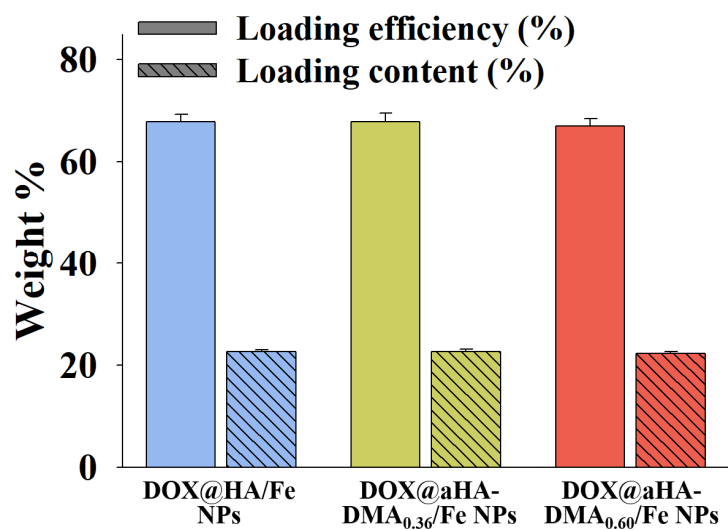

**Figure S5.** DOX loading efficiency and loading content of DOX@HA/Fe NPs, DOX@aHA-DMA<sub>0.36</sub>/Fe NPs, and DOX@aHA-DMA<sub>0.60</sub>/Fe NPs (n=3, as multiple experiments).
